# Supplementary material for: Fu brick tea protects against high-fat diet-induced obesity phenotypes via promoting adipose browning and thermogenesis in association with gut microbiota
Source: Royal Society of Chemistry journal article supplement (doi:10.1039/d2fo02063g), 2022-01-01
Supplement: d2fo02063g1.pdf [file d2fo02063g1.pdf]

## Supplemental Materials

**Fu brick tea protects against high-fat diet induced obesity phenotypes via promoting  
adipose browning and thermogenesis in association with gut microbiota**

Haiping Du,<sup>a</sup> Lin Shi,<sup>\*a</sup> Tao Yan,<sup>a</sup> Qi Wang,<sup>a</sup> Yu Wang,<sup>a</sup> Yan Zhao,<sup>b</sup> Xingbing  
Yang<sup>\*a</sup>

*<sup>a</sup>Shaanxi Engineering Laboratory for Food Green Processing and Safety Control, and  
Shaanxi Key Laboratory for Hazard Factors Assessment in Processing and Storage of  
Agricultural Products, College of Food Engineering and Nutritional Science, Shaanxi  
Normal University, Xi'an 710119, China*

*<sup>b</sup>Key Laboratory of Ministry of Education for Medicinal Resource and Natural Pharm  
aceutical Chemistry, College of Life Sciences, Shaanxi Normal University, 710119, C  
hina*

\*Corresponding author:

Lin Shi: [linshi198808@snnu.edu.cn](mailto:linshi198808@snnu.edu.cn); TEL: 86-18133943516

Xingbing Yang: [xbyang@snnu.edu.cn](mailto:xbyang@snnu.edu.cn); TEL: 86-13709280218

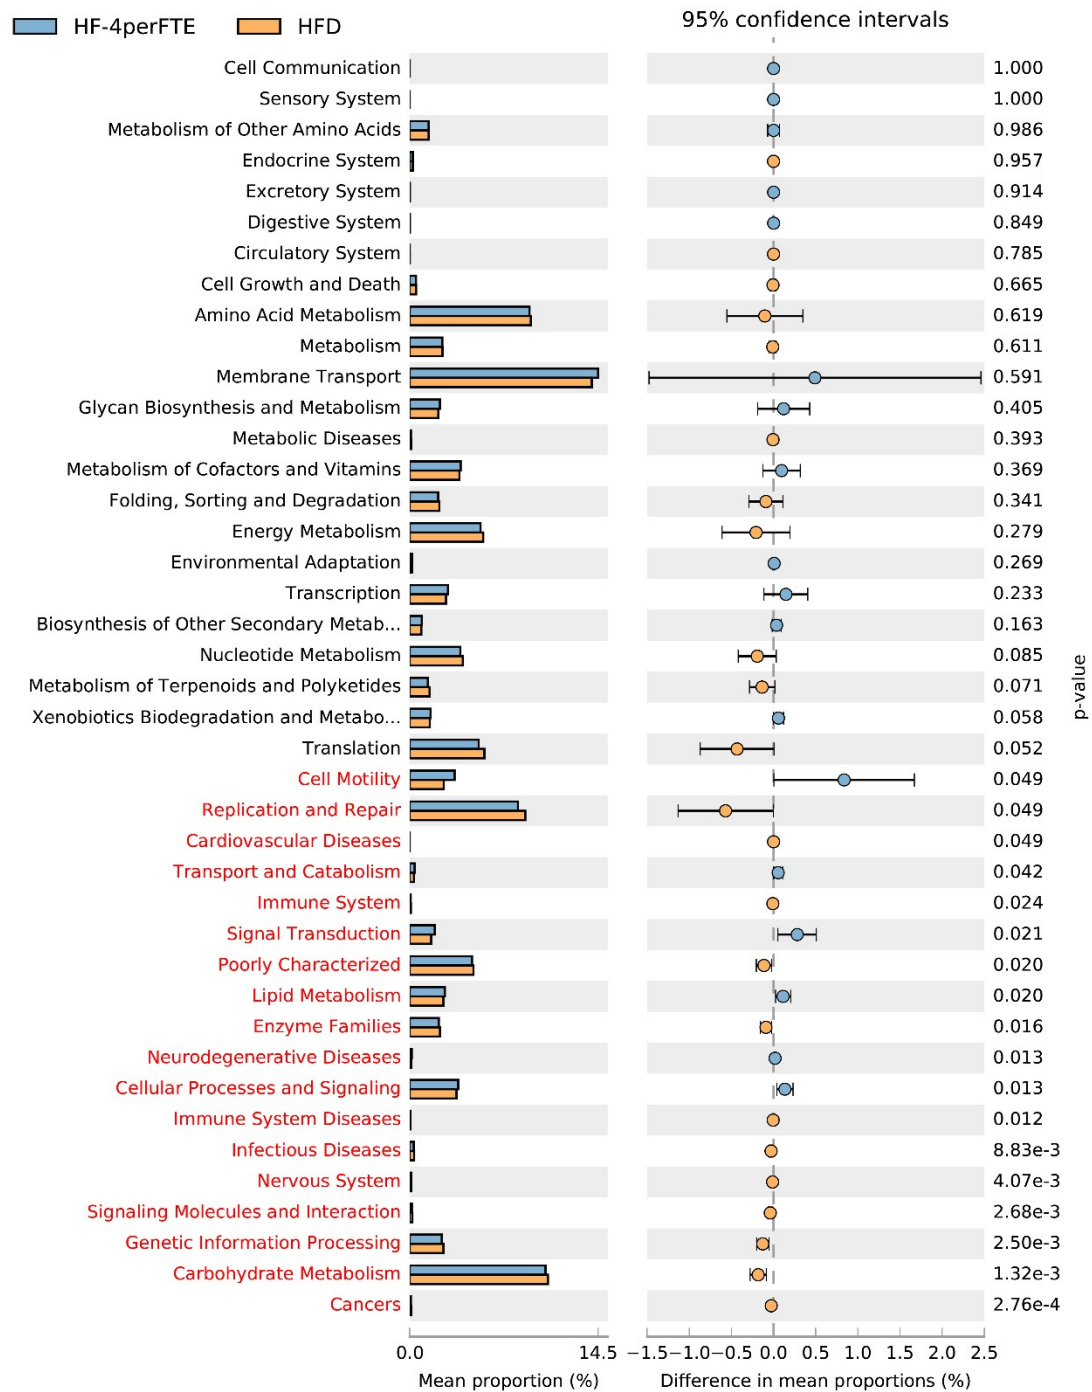

**Fig. S1** The Phylogenetic Investigation of Communities by Reconstruction of Unobserved States (PICRUSt) pathway analysis of 4% Fu brick tea water extracts (FTE) upregulated genes compared with the ND group.

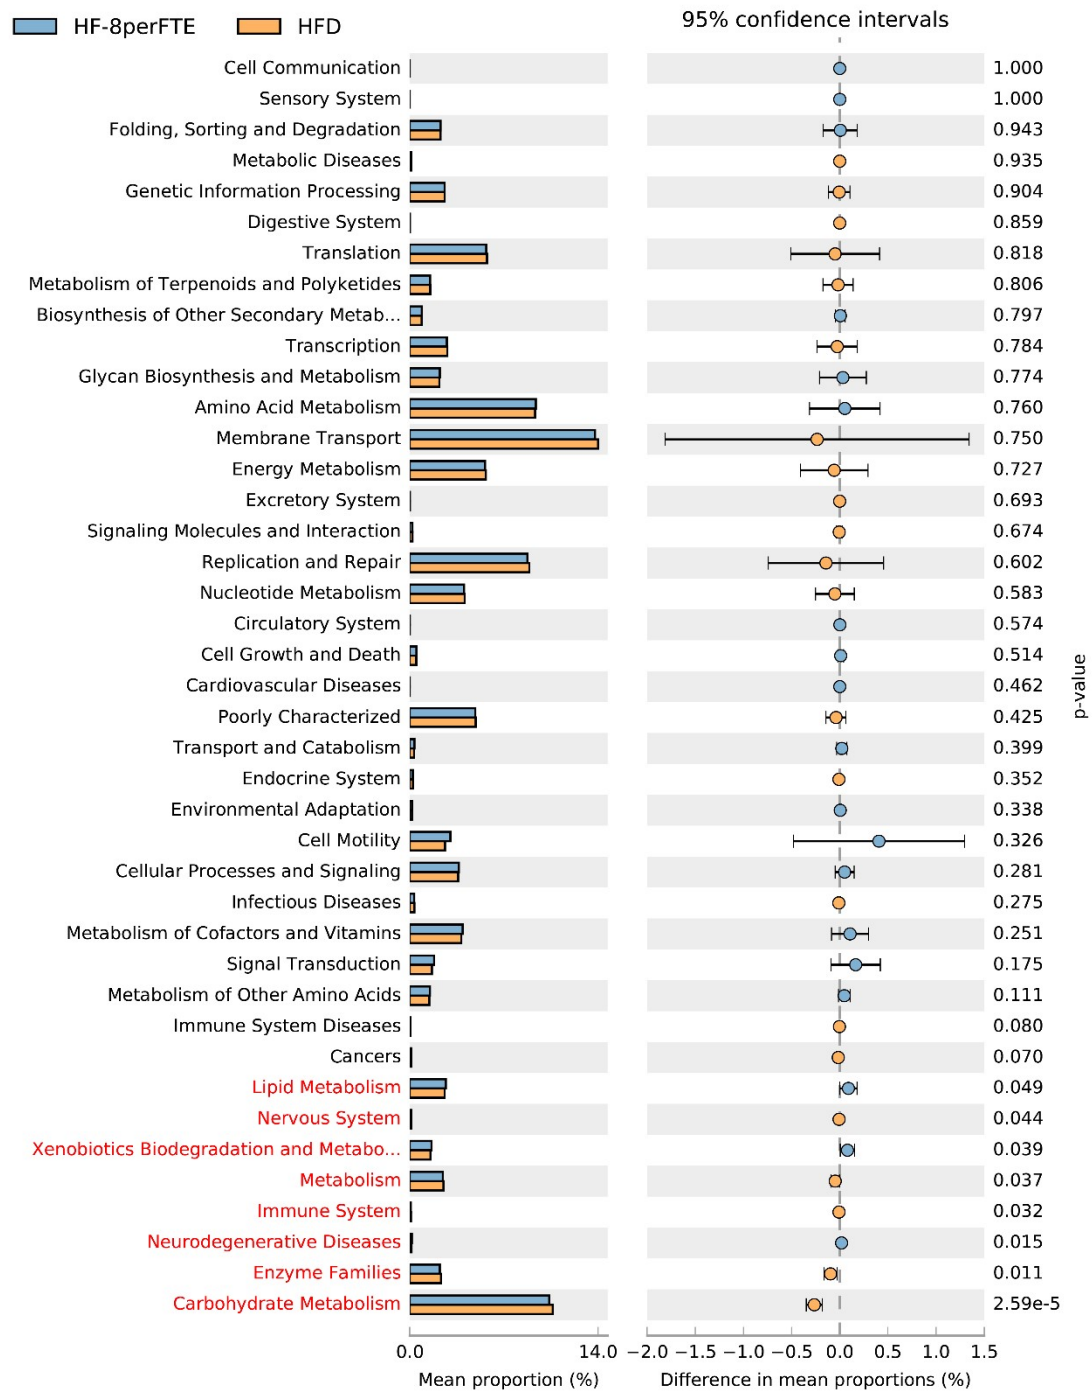

**Fig. S2** The Phylogenetic Investigation of Communities by Reconstruction of Unobserved States (PICRUSt) pathway analysis of 8% Fu brick tea water extracts (FTE) upregulated genes compared with the ND group.
